# Supplementary material for: MS23, a master basic helix-loop-helix factor, regulates the specification and development of tapetum in maize
Source: Oxford University Press journal article supplement (doi:10.1242/dev.140673), 2016-01-01
Supplement: dev140673supp.pdf [file dev140673supp.pdf]

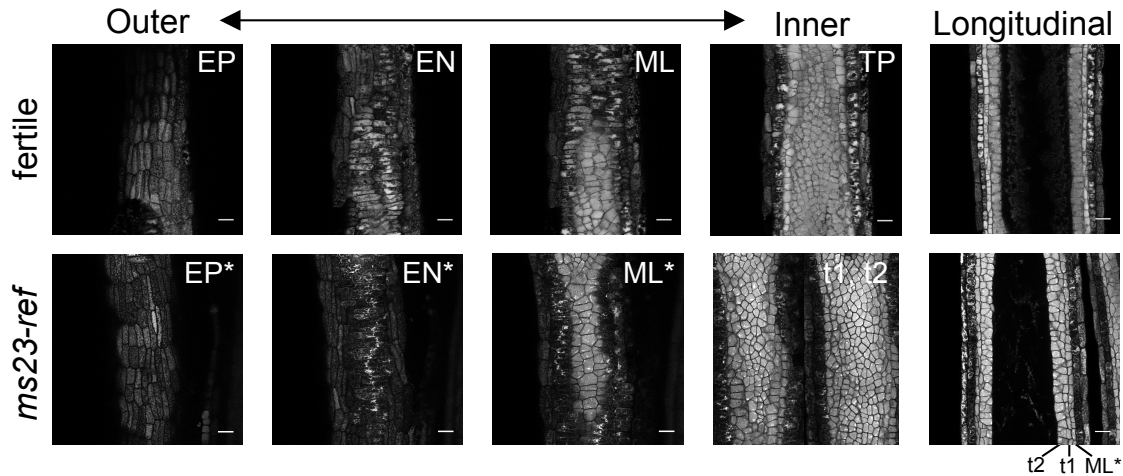

**Fig. S1. Confocal images of the *ms23-ref* and its fertile sibling anthers at various depths (Z-axis) at Stage 10.** The cell shape and morphology of EP versus EP\*, EN versus EN, and ML versus ML\* are indistinguishable at this stage. The two innermost layers (t1 and t2) in mutant anther are indistinguishable from each other under confocal from the XY-planes, indicating these two layers are sisters resulting from extra periclinal divisions while ML\* is formed earlier. Judging from the central, longitudinal plane, however, t1 cells have a shorter Z-dimension, similar to ML/ML\*, while t2 cells have a longer Z-dimension, resembling TP. In fertile anthers, EP – epidermis; EN – endothecium; ML – middle layer; TP – tapetum. In *ms23-ref* anthers, EP\* - the presumptive epidermis; EN\* - the presumptive endothecium; ML\* - the presumptive middle layer; t1 – the defective fourth layer; t2 – the defective fifth layer.

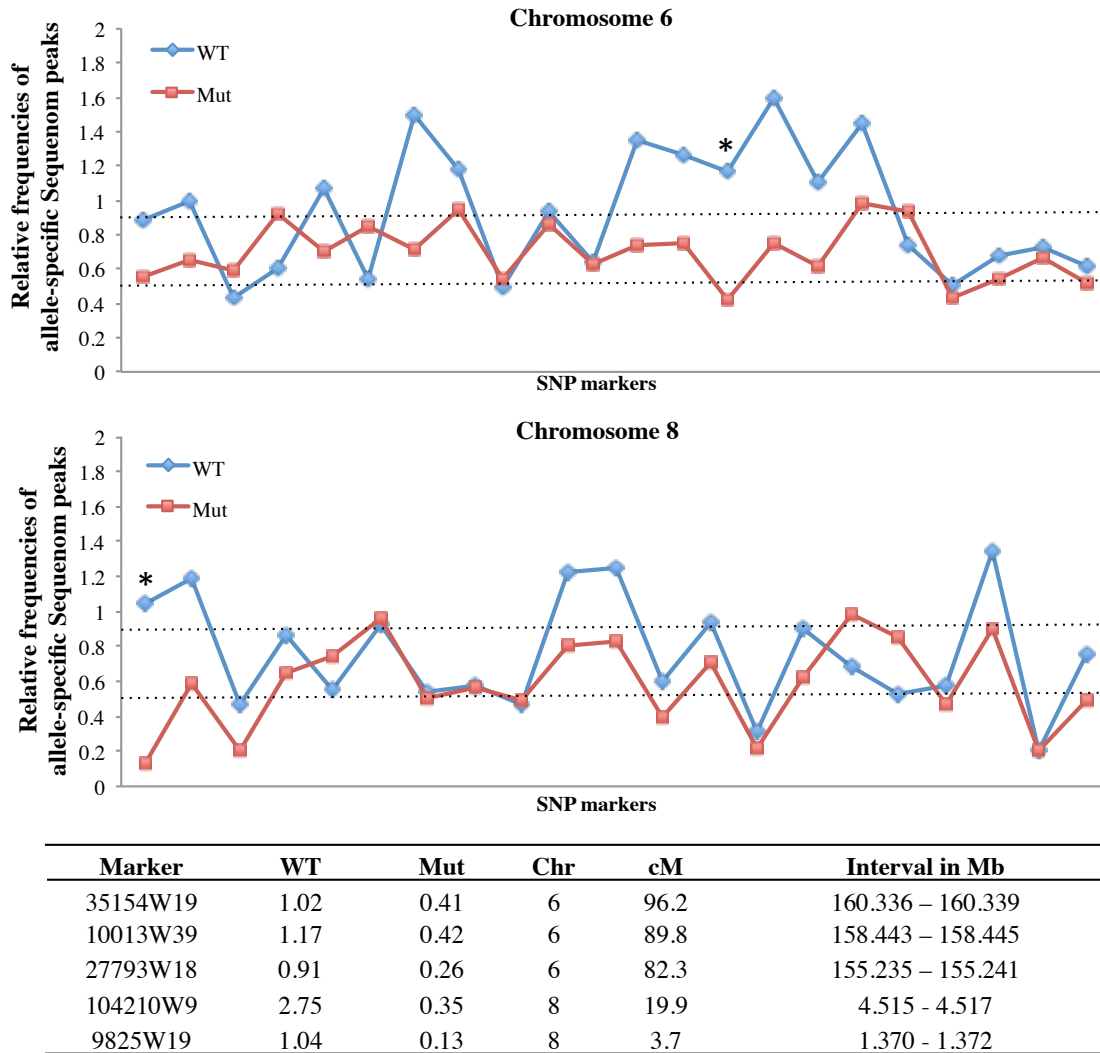

**Fig. S2. High-throughput genetic mapping of *Ms23* via quantitative SNP-genotyping on a Sequenom chip.** Segregating *ms23-ref* mutant (Mut) and wildtype (WT) genomic DNA pools were analyzed using the Maize Bulk Segregation Analysis service at the Genomic Technologies Facility at Iowa State University against a set of SNP markers ( $n=1,016$ ). Using 0.9 and 0.5 cut-offs for wildtype (WT) and mutant (Mut) pools, respectively, *Ms23* was placed on chromosomes 6 and 8 at the locations indicated (\*).

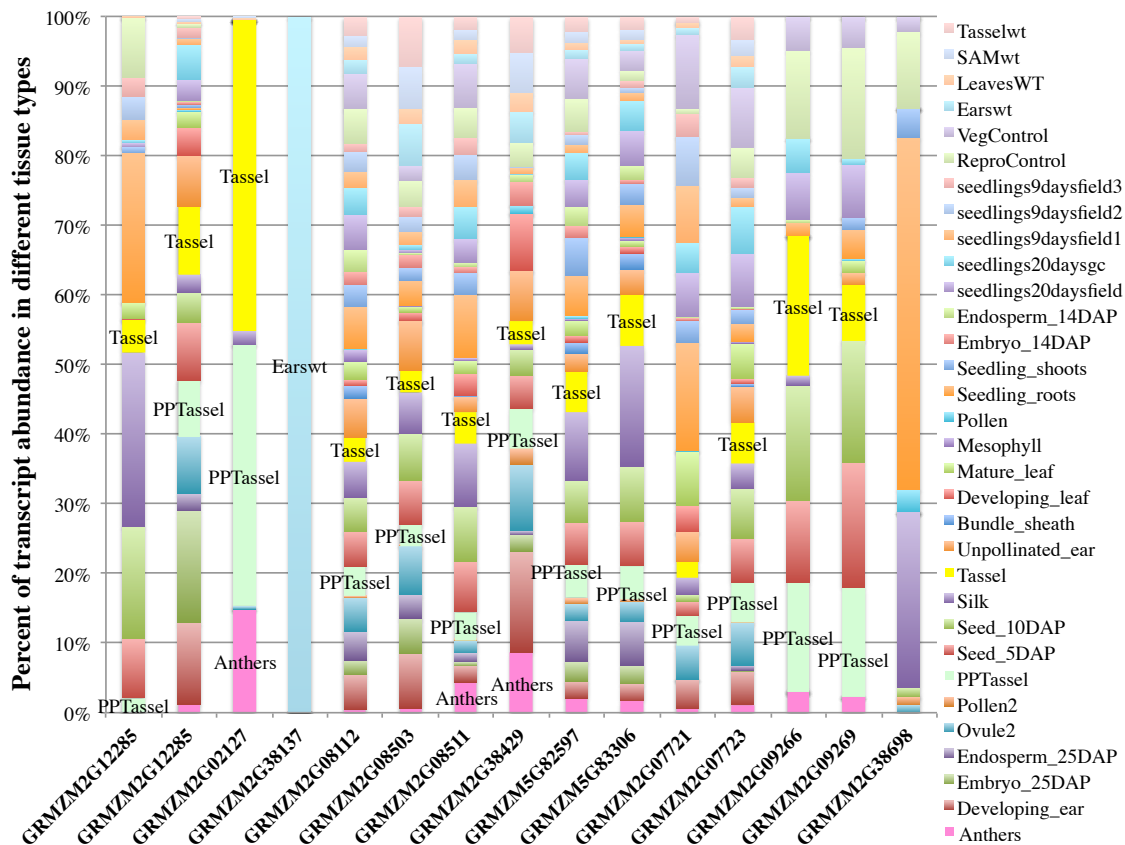

**Fig. S3. Tissue-specific transcript abundances of fifteen gene models near the tip of chromosome 8 based on the data on qTeller (<http://qteller.com/>). Y-axis is the percentage of transcript abundance in each tissue type over the sum of abundance from all 32 tissues as 100%.**

**A**

GTTTAATAACCTTGCACTGCCGAGTAGCCCTTAACTGCTGCTATCTATCTCTTTTCTGAAGGAAAAAAAA  
 GGTGGTACTCTCTACTAGCTAGTCCCTGCATGCCGCTAATGTGCGTCTTGCCCTGTTTATTTGTTCTTA  
 ATAAGGGCTGCCTATCTATTATATTTTTGCACCTGTTTTGCTGTGTTCTTGGTAACTAGCTTAATTCCTTCG  
 CCTACAATCGTCAAATCCCCCATCATCAGTCAGATGAACCTTTGATCGAATTGAAGTTGTTCTTCTAAT  
 TCGGCCCCAGCAGCCCATGCATCTGGTTTTATTGCTTTCTGTTGGGTATAATATGCAAGACCTTTTGT  
 TGCTAGGGCAAGGCTGCAACCACATGCGTGTACTGAACCTCATGATGTAACCTCATCTTTTTTGTTCAC  
 AGAATCACTACTCTACTGCACCTTCTTTTCATCCGATCCGCAATCTTTTTTTTTCTTTTACATGCTTTAGTT  
 TTCTCTCTTTCTTGATTACAAACATGATTACTGGAACCTTTCTTAGGCTGCCTTCCCCTTCTTGGATCTGC  
 TTTAGTTTTCTTTTTTGGGCTACCGCGCGCGGCTTATTTGAGTTTATCACTTGCATATACATAATATA  
 TATATACATGCATGCGATGGCGTTCATGTTACTCAACTACAGATCTGTTTCTGTTCTGTTGTTTTCAGTTCA  
 CGCGCAGTTAAGCATAGCAGGACGACCAGCAGCATACCCGAGTGCAGCTC CTGACGATGGCG  
 CACGAAACGCCGACCTGGACGCCGCGCCAGCCACCTAACCGTCTCCGGCGTCGCCAGCATCCCGGCA  
 GCTGAGCTTCCACCTGCTGCACTCGCTCGACGCCGCGGCGGGTCAATCCCCTCACGGCGCCGCCGAGT  
 CCACCATCGACTACTTCTCGGCGGCGCCGATCCCCACCAGCAGGCCATGCAGTACGAGCCGCTGCCGCC  
 GCCGCGGGCGGCCACCACCAGTACACCATGGACATGTTCCGCGACTACTGCGACGCCACTACCCACCGC  
 CGAGCCGTACATCCGCGGGACAATGACTGGAGCCCTCGTGTTCGGGGCCACCGACGACGACTCGGCCG  
 CTGCCATACAT GCCC GGGGGGCACTTTGAGACCTCCCCGCGCCGCCACGCGCCACCGGCCGCGGCAGGAA  
 CGGGGACAGGCGCTGGGCGGCGGCTTCCATGCTGTGCTGGCAACGGCGTCGAGAAGAAGGAGAAGCAGC  
 GCCGGCTGCGGGCTACCCGAGAAGTACACCGCCCTCATGCACCTCATAACCAACGTTACAAAGGTCGTACCA  
 AATCTCCTCTTATGTTTCGTCATCGTTTCAAATTAAGTTAAAAAATTAATTCACGGTCTTGTGTTTAT  
 TTTTTGCGCACTGCAG ACTGATAGGGCGACGGTGTCTCGGACGCGATCGAGTACATCCAGGAGCTGGGGA  
 GGACGGTGGAGGAGCTGACGCTGCTGGTGGAGAAGAAGCGGCGCCGGAGGGAGC TGCAGGGGGACGTCGTG  
 GACGCGGCGCCGGCTGCGGTGGTTGCTGCCCGCGGTGAGGCGGAGAGCTCGGAGGGCGAGGTGGCTCCTCC  
 GCCGCGGGCGCTGCCGCGGACCCGATCCGGAGCAGTACATCCAGCGGGGAGCAAGGACACGTCCTGTTG  
 ACGTGGGATCGTGGAGGAGGACGTGAACATCAAGCTACCAAGCCGCGCGACGGGTGCCCTGCAGCC  
 GCGTCGCGCGCTGGATGACCTCCGCTTACCTCGTCCACCTCTCCGGCGCAAGATCGGTGACTGTCA  
 AATCTACATGTTCAACACCAAGGTACATACGAATACGATACGTAGCCATTGATCGATCTGTAATTCGTAG  
 CCTGACGATTCCGAGGTTTCTGGTGTAAAAATGCATCTTTTTTCTCAGATGACAATGCTTTCTGTCTT  
 TGTTACCCGAGATTCACAAGGGGTCTTCAGTGTTCGAGTGCAGTGGCCGGTAGGCTGATGGAAGTGGT  
 GGACGAGTACTAGGCTACCATGCACCTGAATTTCTAGCTAGCTCTACGTACCGCGCTGCTATGAATCTAGC  
 TATAGCCTTCTTGGATGAAAGACTAGTTAGTTGTTACCTTCTATCTTTGCTTCAATTAATCCGCTTGTCT  
 CGTTACAGACTGATTTTCTTAAATGTCAAGGTTGTTTTGTTCAAATTAATTAATTAATTAATTAATTAATTA  
 TGTGAGGTTATTATATATATTTATGTGTTTATTACTGGTCTATTAATTTGTCTTATTATTA

**B**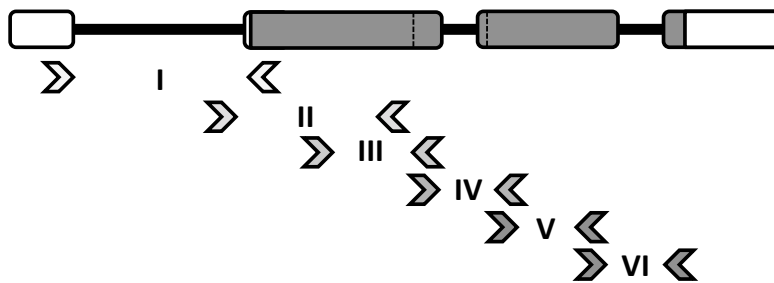

|     | Forward Primer       | Reverse Primer       |
|-----|----------------------|----------------------|
| I   | TGCACCTGTTTTGCTGTGTT | TGATACATCGTCTGGTCTGT |
| II  | CGACCACGACGATGTATCAC | CGCTGCTTCTCCTTCTTCTC |
| III | ACTACTGCGACGGCCACTAC | CATGAGGGCGGTGTACTTCT |
| IV  | CGGCTCACCGAGAAGTACAC | CCGCTTCTTCTCCACCAG   |
| V   | GAGGAGCTGACGCTGCTG   | CCGCTTCTTCTCCACCAG   |
| VI  | GTGGAGGAGGACGTGAACAT | ACTCGTCCACCCTTCCATC  |

**Fig. S4. Cloning of *Ms23*.** (A) The nucleotide sequence of GRMZM2G021276 with the four exons underlined, the translated region in bold, and the encoded bHLH domain in blue. The positions of frameshift mutations in the *ms23-6027* and *ms23-6059* alleles are indicated as orange and green arrows, respectively. (B) Placement and sequences of the PCR primers across the gene model of *bHLH16* (GRMZM2G021276).

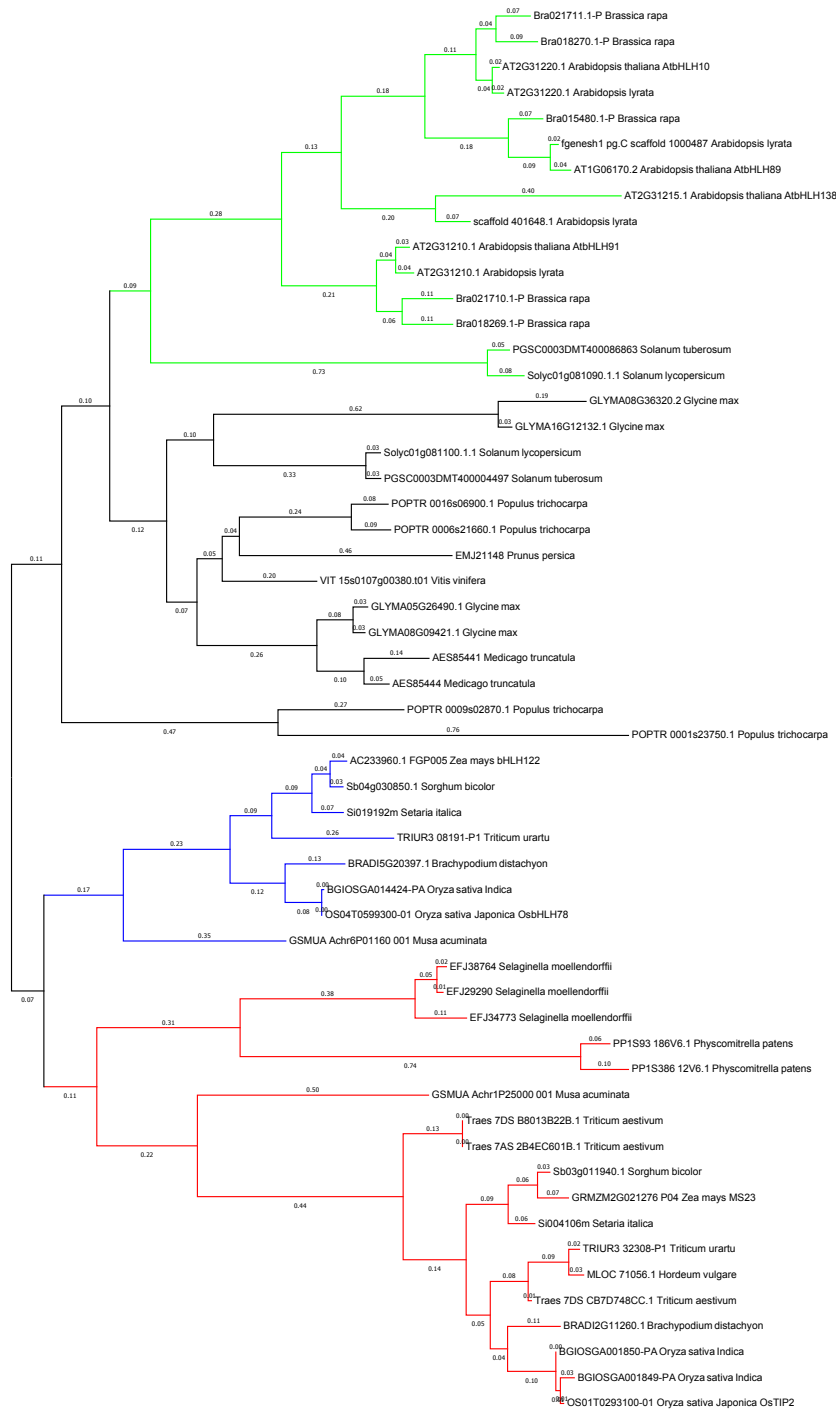

**Fig. S5. Phylogenetic analysis of the orthologs of both MS23 and its paralog, bHLH122, (<http://www.gramene.org/>).** The tree was generated using MEGA 6.06 (Tamura et al., 2013) by the maximum likelihood method based on the Poisson model; the tree with the highest log likelihood (-29072.8504) is shown. The tree is drawn to scale, with branch lengths measured in the number of substitutions per site. The analysis involved 55 amino acid sequences. There were a total of 1,146 positions in the final dataset.

| Gene         | Species                     | [ BASIC ] [ HELIX ] ~ LOOP ~ [ HELIX ]                      | No. of amino acids |
|--------------|-----------------------------|-------------------------------------------------------------|--------------------|
| MS23         | <i>Zea mays</i>             | ANGVEKKEKQRRRLRTEKYTALMHLIPNVTKTDRATVISDAIEYIQELGRVVEELTLV  | 59                 |
| TIP2/bHLH142 | <i>Oryza sativa</i>         | ANGVEKKEKQRRRLRTEKYNALMLLIPNRTKEDRATVISDAIEYIQELGRVVEELTLV  | 59                 |
| bHLH89       | <i>Arabidopsis thaliana</i> | KRKIFPTERRRRVHFKDRFGDLKNLIPNPTKNDRASIVGEAIDYIKELLRTIDEFKLLV | 59                 |
| bHLH10       | <i>Arabidopsis thaliana</i> | KSRTSPTERRRRVHFNDRFFDLKNLIPNPTKIDRASIVGEAIDYIKELLRTIEEFKMLV | 59                 |
| bHLH91       | <i>Arabidopsis thaliana</i> | KNKPFPTERRRRCHLNERYEALKLLIPSPSKGDRASILQDGIDYINELRRRVSELKYL  | 59                 |
| bHLH122      | <i>Zea mays</i>             | KAN-FATERERREQFNVKYGALRSLFPNPTKNDRASIVGDAIEYINELNRTVKELKILL | 58                 |
| EAT1/DTD     | <i>Oryza sativa</i>         | KAN-FATERERREQLNVKFRTLRMLFPNPTKNDRASIVGDAIEYIDELNRTVKELKILL | 58                 |
| bHLH51       | <i>Zea mays</i>             | QCKNLEAERKRRKLNRLYKLRSLVPNISKMDRAAILGDAIDYIVGLQNVKALQDEL    | 59                 |
| TDR          | <i>Oryza sativa</i>         | QCKNLEAERKRRKLNGLHYKLRSLVPNITKMDRASILGDAIDYIVGLQKQVKELQDEL  | 59                 |
| AMS          | <i>Arabidopsis thaliana</i> | QAKNLEAERRRKLNDRLYALRSLVPRIKLDRASILGDAINYVKELQNEAKELQDEL    | 59                 |
| MS32         | <i>Zea mays</i>             | KSKNLEAERKRRGKLNRRNIALRAVVPNITKMSKESTLSDAIDLKRLQNVLELQRQL   | 59                 |
| UDT1         | <i>Oryza sativa</i>         | KSKNLEAERRRRGLNGNIFALRAVVPKITKMSKEATLSDAIEHIKNLQNEVLELQRQL  | 59                 |
| DYT1         | <i>Arabidopsis thaliana</i> | KSPNLEAERRRRKELHCLRLMALRSHVPIVTNMTKASIVEDAITYIGELQNNVKNLLET | 59                 |

\*:.\*: : : \* . \* : : : . : : : \* : .

**Fig. S6. Multiple sequence alignment of the bHLH domains of fourteen tapetum-associated bHLH proteins from maize, rice, and Arabidopsis.** A partially duplicated pseudogene, *bHLH138* from Arabidopsis is excluded. An asterisk (\*) indicates positions that have an invariant residue; a column (:) indicates conservation between groups of strongly similar properties with scoring > 0.5 in the Gonnet PAM 250 matrix; a period (.) indicates conservation between groups of weakly similar properties with scoring ≤ 0.5.

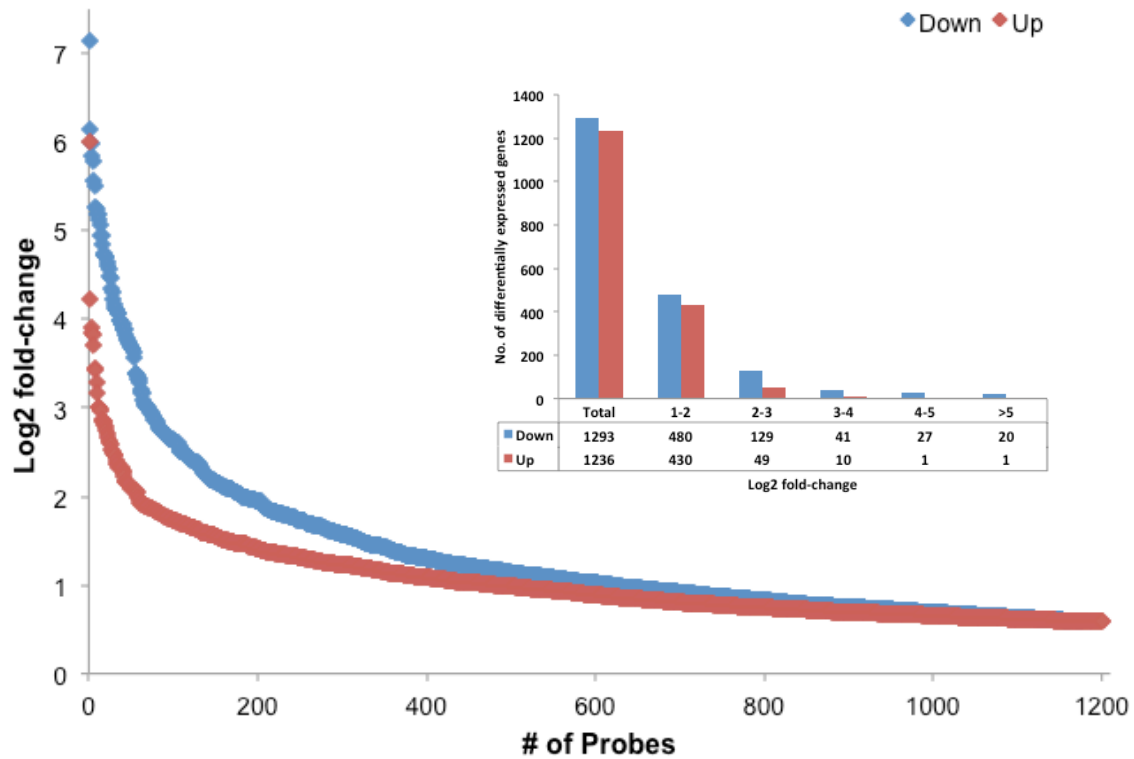

**Fig. S7. Distribution of differentially expressed genes in *ms23-ref* mutant on the array.** Up- and down-regulated genes comparing *ms23-ref* to its fertile sibling at Stage 9 were plotted based on their  $\log_2$  fold change values. Inset: Counts of genes at different ranges of fold changes.

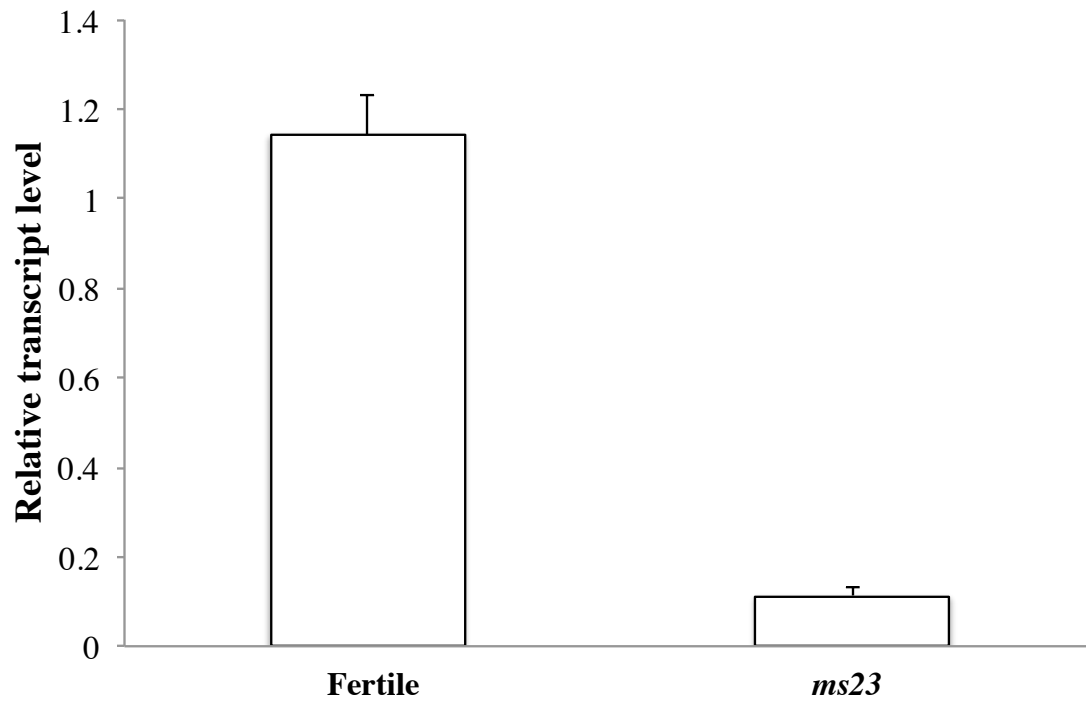

**Fig. S8. Quantitative RT-PCR assays of *Dcl5* expression.** *Dcl5* transcript levels in fertile and *ms23-ref* anthers at Stage 8. Expression values were normalized to the cyanase gene.



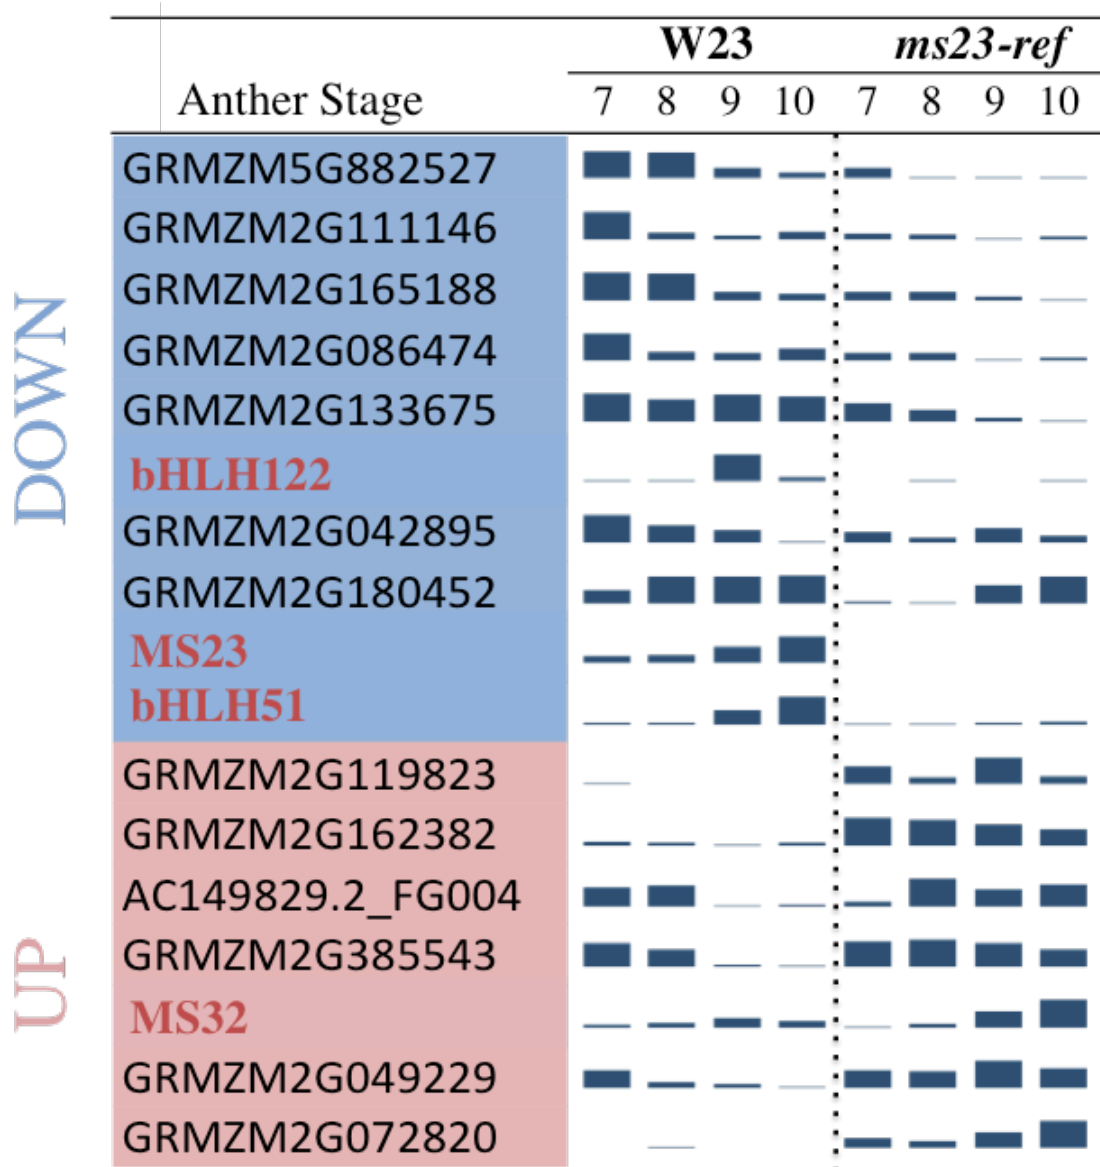

**Fig. S9. Role of *Ms23* in regulating expression of the bHLHs with highest transcript abundance in fertile anthers.** Maize bHLH genes with the sum of abundance in the top quartile (n=75) and with 4-fold or more difference (n=18) between *ms23-ref* mutant and W23 fertile anthers. Data are from RNA-seq analysis.

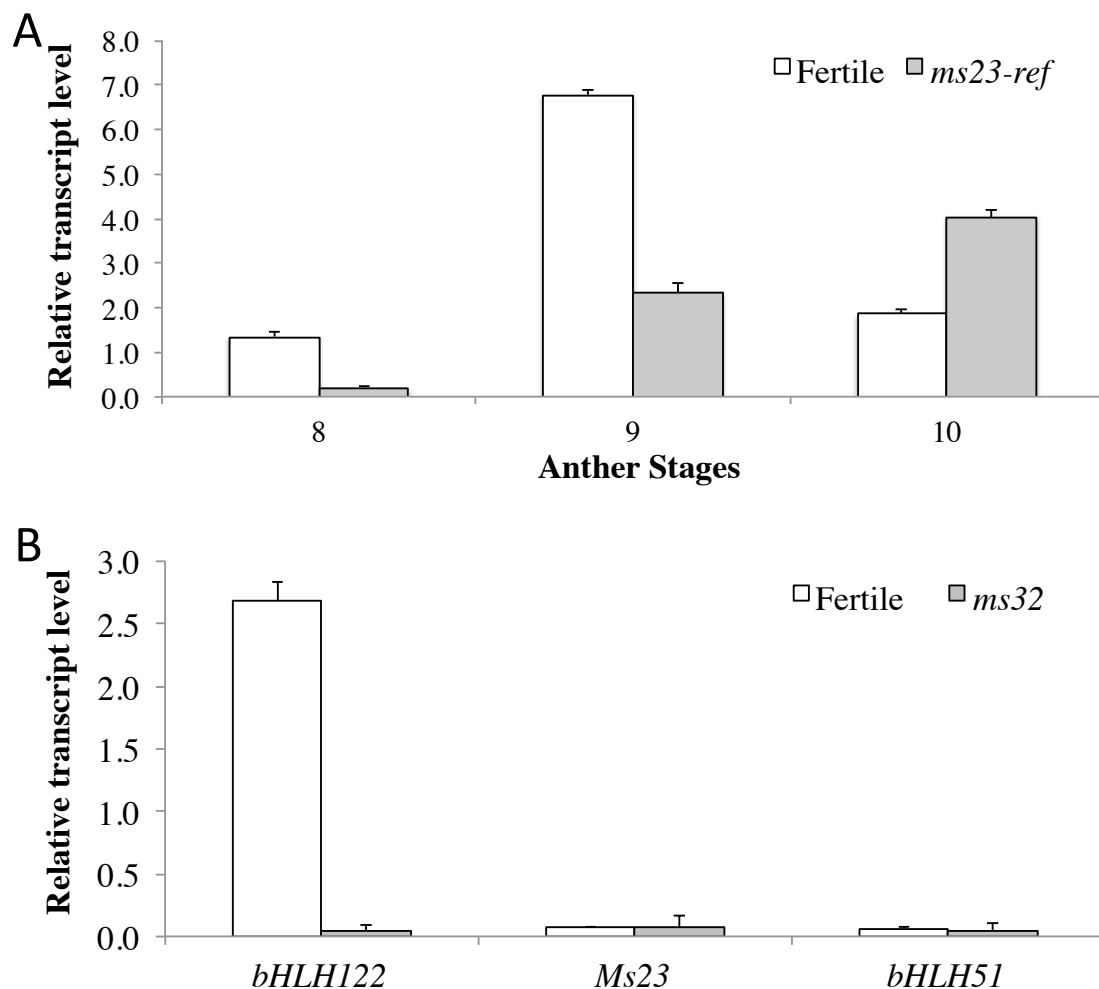

**Fig. S10. Quantitative RT-PCR assays of gene expression.** (A) *Ms32* transcript levels in fertile and *ms23-ref* anthers at various anther stages. (B) *Ms23*, *bHLH122*, and *bHLH51* transcript levels in fertile and *ms32* anthers at Stage 9. Expression values were normalized to the cyanase gene.

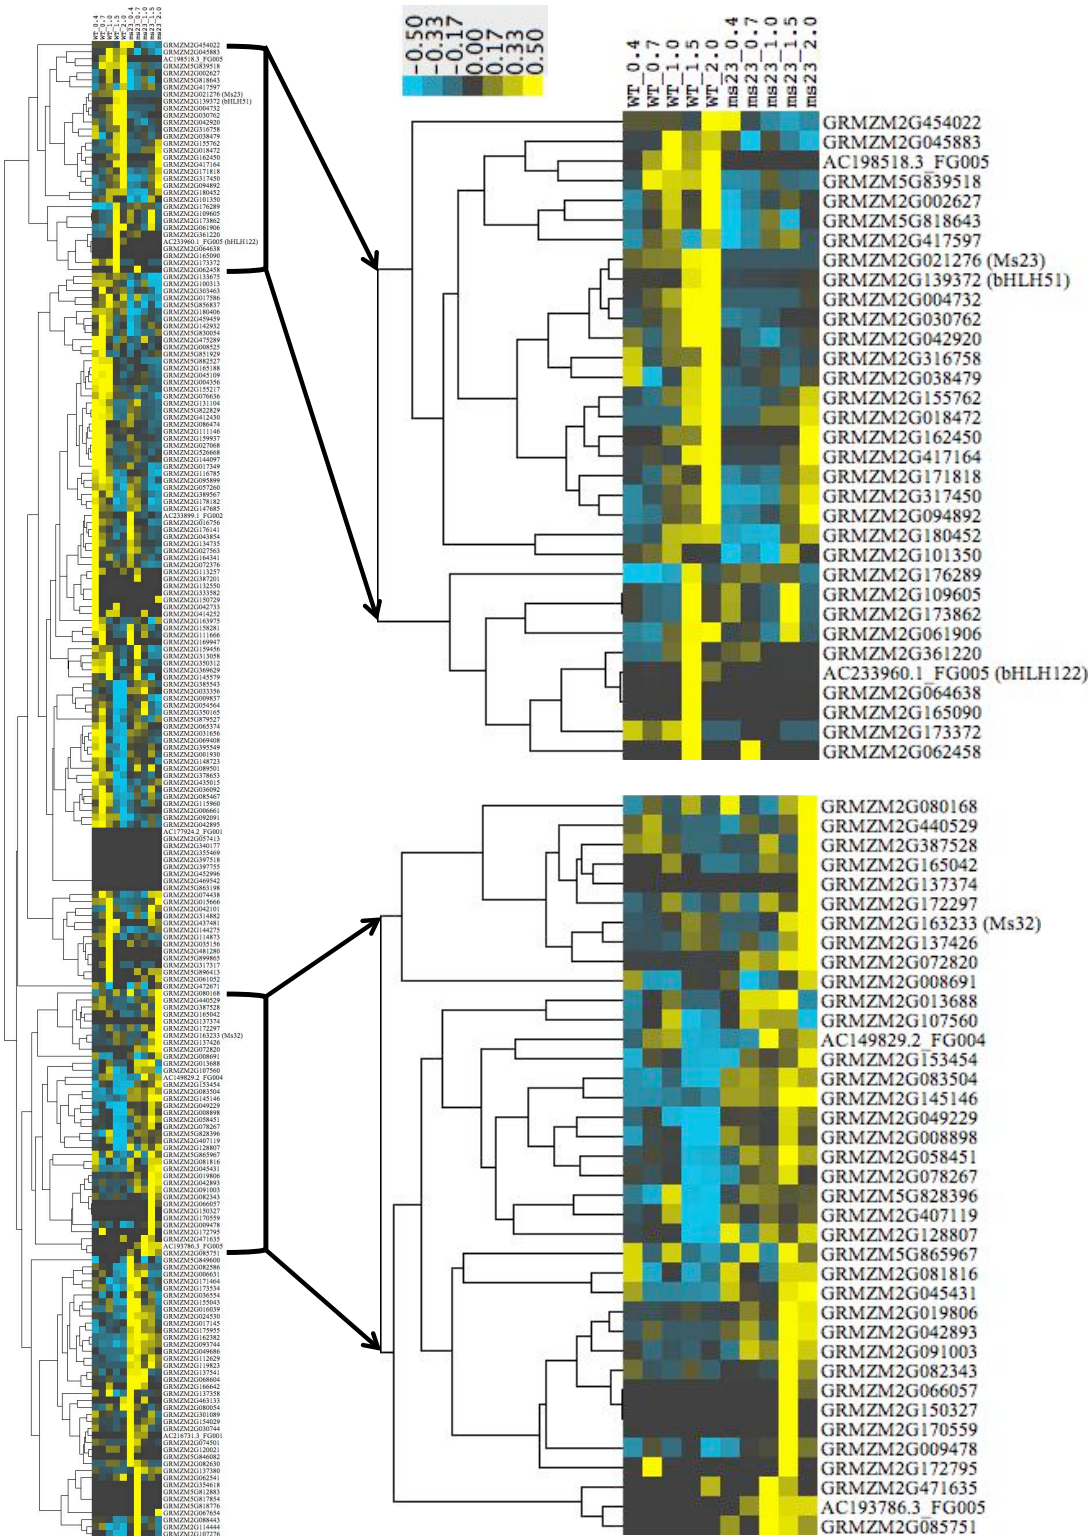

**Fig. S11. K-median clustering of 213 maize bHLHs based on the expression patterns in both W23 fertile and *ms23-ref* anthers at stages 4, 7, 8, 9, and 10.** The heatmap was generated using Cluster 3.0 program based on Euclidean similarity and average hierarchical linkage.

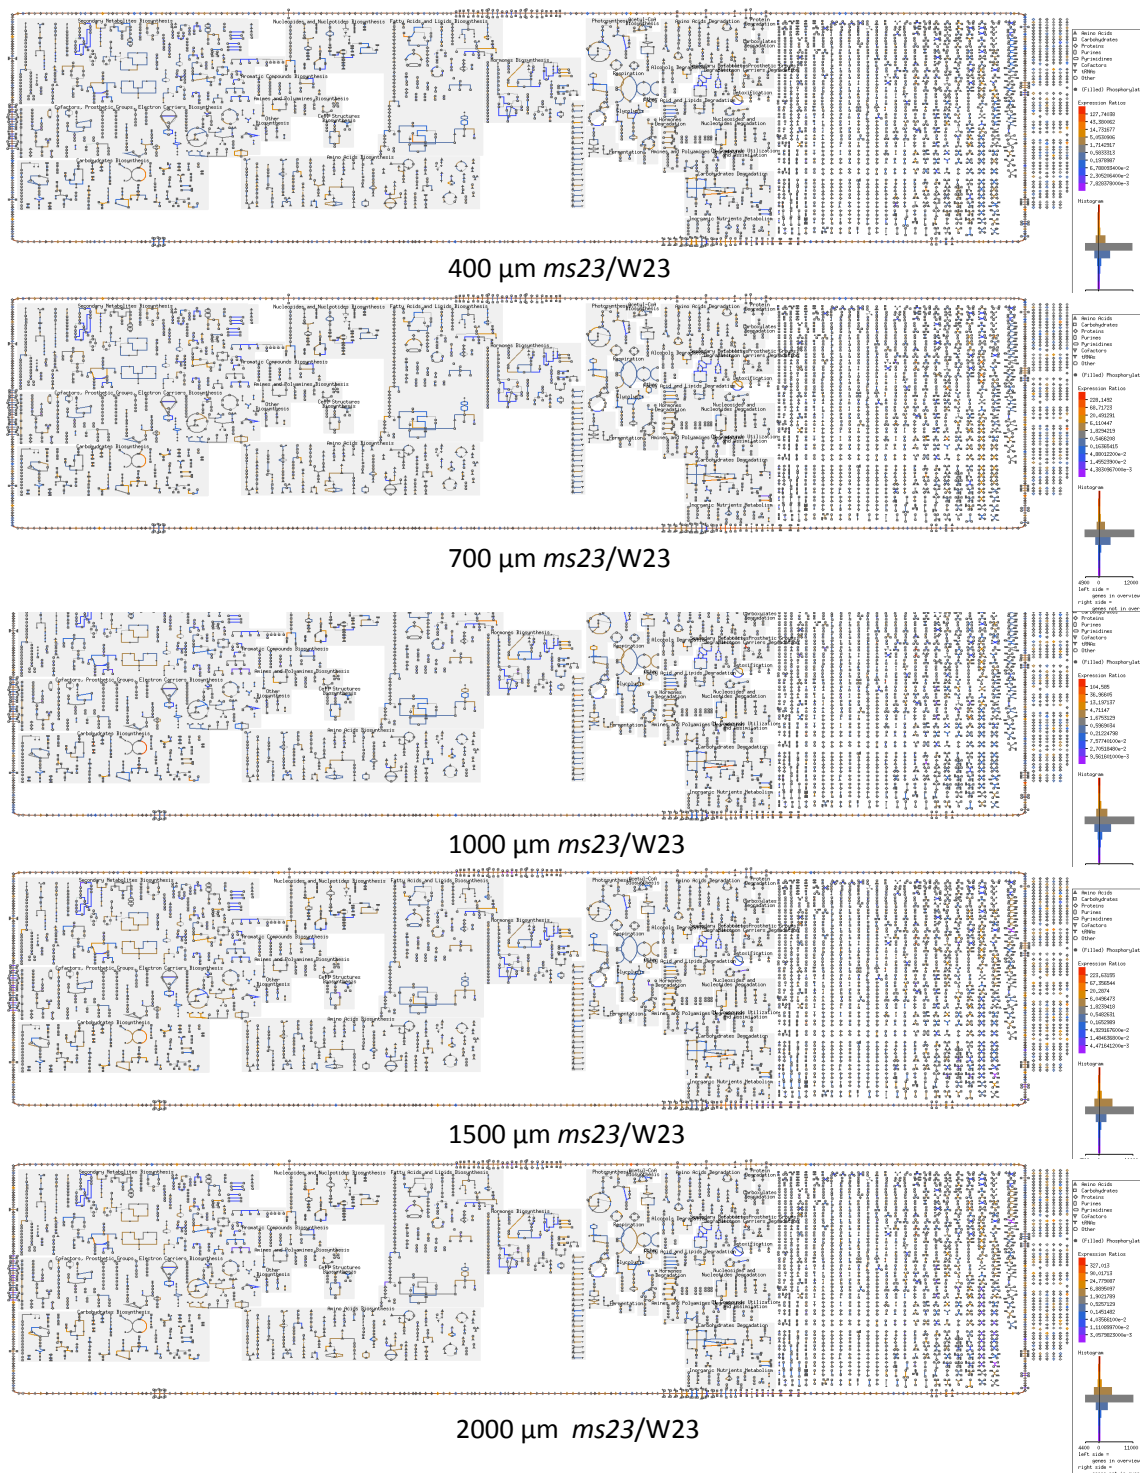

**Fig. S12. Pathway mapping using the transcriptomic analysis tool (<http://pathway.gemene.org/maizecyc.html>) comparing *ms23-ref* and the *W23* fertile inbred at the 400-, 700-, 1,000-, 1,500-, and 2,000- $\mu\text{m}$  stages based on RNA-seq. Data are from the Gene Expression Omnibus (GEO) database, [www.ncbi.nlm.nih.gov/geo](http://www.ncbi.nlm.nih.gov/geo) (accession nos. GSE52290 described in Zhai et al., 2015).**

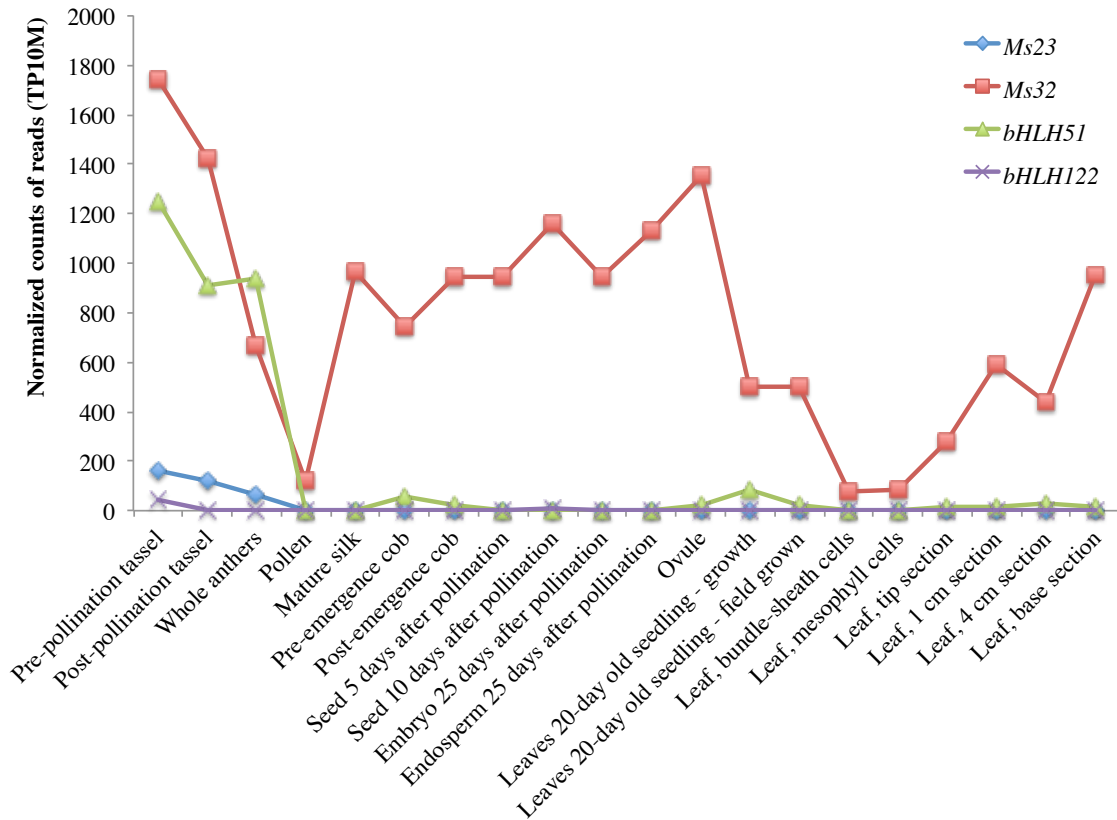

**Fig. S13. Expression patterns of *Ms23*, *Ms32*, *bHLH51*, and *bHLH122* in various organs.** Normalized sum of abundances from twenty vegetative and reproductive tissues across a wide range of developmental stages were compiled from published RNA-seq data. The total counts of RNA-seq reads in each gene model are normalized to 10 million reads (TP10M) ([https://mpss.danforthcenter.org/dbs/index.php?SITE=maize\\_RNAseq](https://mpss.danforthcenter.org/dbs/index.php?SITE=maize_RNAseq)).

| Bait    | Prey    | Low Stringency | High Stringency | Interaction |
|---------|---------|----------------|-----------------|-------------|
| Empty   | Empty   |                |                 | No          |
| Empty   | MS23    |                |                 | No          |
| Empty   | MS32    |                |                 | No          |
| Empty   | bHLH51  |                |                 | No          |
| Empty   | bHLH122 |                |                 | No          |
| MS23    | Empty   |                |                 | No          |
| MS23    | MS23    |                |                 | No          |
| MS23    | MS32    |                |                 | No          |
| MS23    | bHLH51  |                |                 | Yes         |
| MS23    | bHLH122 |                |                 | No          |
| MS32    | Empty   |                |                 | No          |
| MS32    | MS32    |                |                 | No          |
| MS32    | bHLH51  |                |                 | No          |
| MS32    | bHLH122 |                |                 | Yes         |
| MS51    | Empty   |                |                 | No          |
| bHLH51  | bHLH51  |                |                 | Yes         |
| bHLH51  | bHLH122 |                |                 | Yes         |
| bHLH122 | Empty   |                |                 | No          |
| bHLH122 | bHLH51  |                |                 | Yes         |
| bHLH122 | bHLH122 |                |                 | No          |

**Fig. S14. Protein interactions determined based on yeast two-hybrid assays.**

Serial dilutions (1,  $10^{-1}$ ,  $10^{-2}$ ,  $10^{-3}$ ) of yeast two-hybrid clones under low (-Leu, -Thr) and high (-Leu, -Thr, -His, -Ala) stringency conditions. Each bait and prey vector contains a bHLH domain from MS23, MS32, bHLH51, or bHLH122. Empty bait (pGBK) and empty prey (pGAD) were used as negative controls.

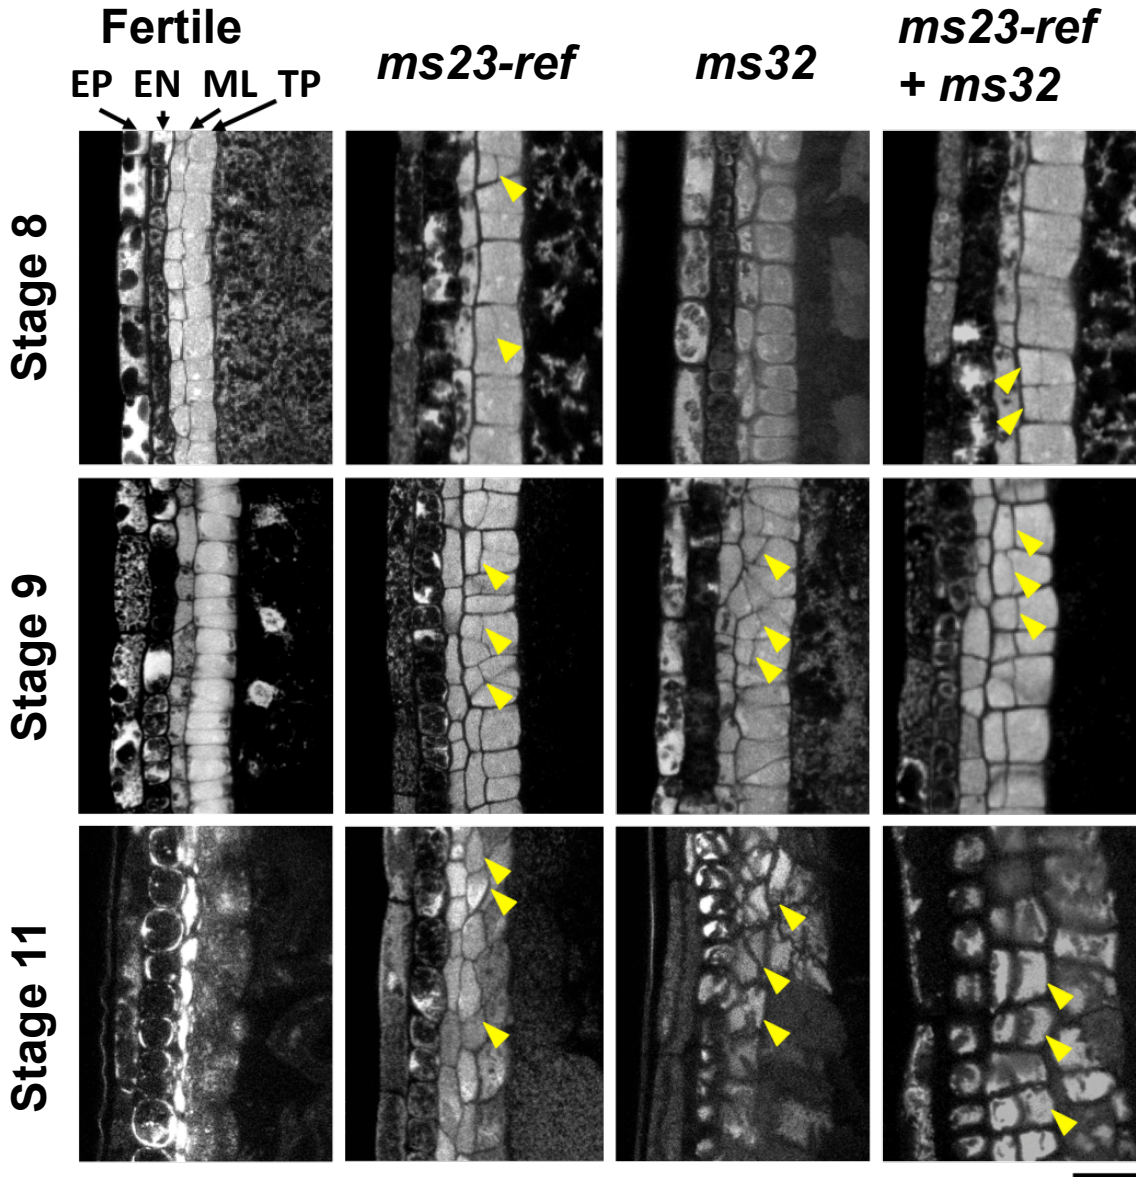

**Fig. S15. Longitudinal confocal images of *ms23-ref*, *ms32*, and the *ms23-ref*, *ms32* double mutant at three developmental stages. Yellow triangles point to cells produced by extra periclinal divisions. Scale bar: 20  $\mu$ m**

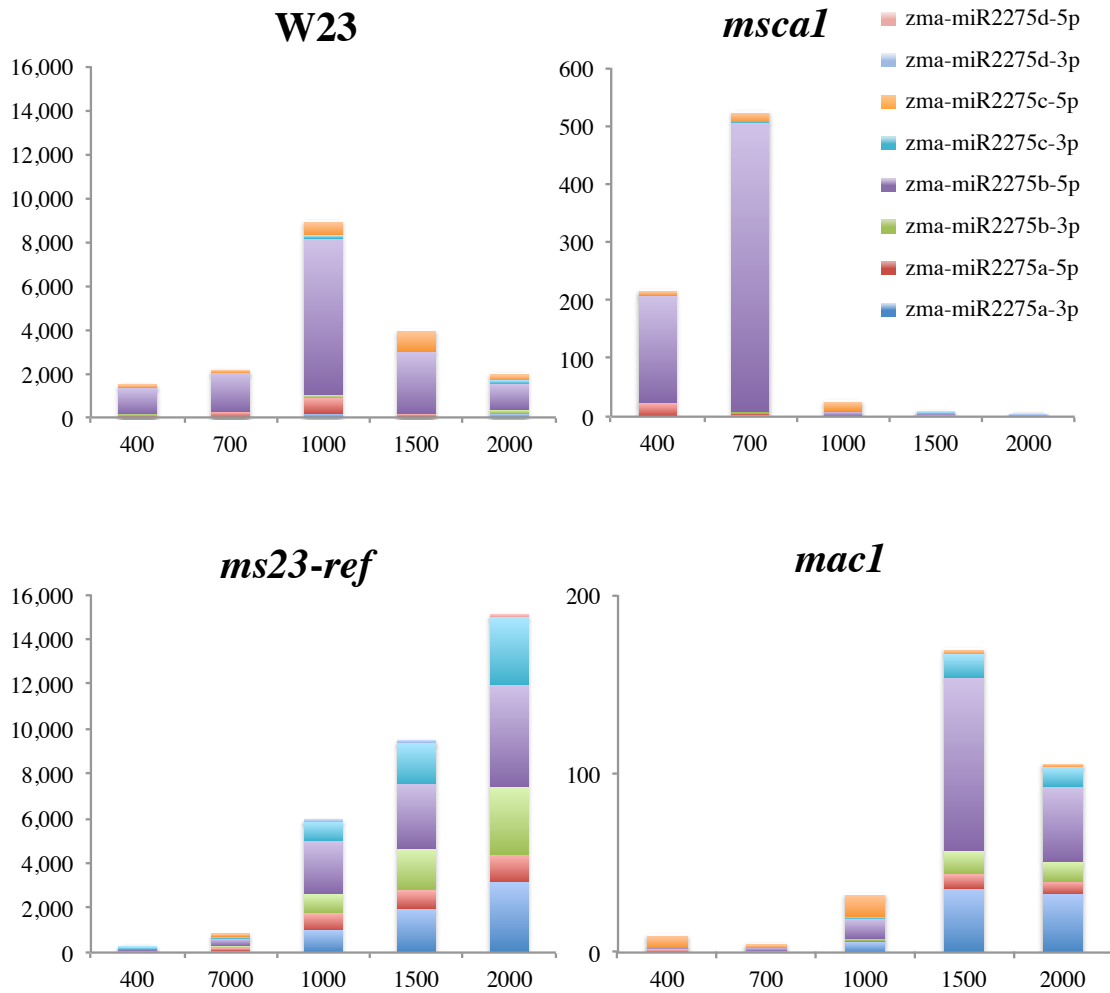

**Fig. S16. miR2275 abundances in W23, *ms23-ref*, *msca1*, and *mac1* anthers based on small RNA-seq data. (A)** The miR2275 profiles of 0.4-, 0.7-, 1.0-, 1.5-, and 2.0-mm anthers of homozygous *ms23-ref*, *msca1*, and *mac1* mutants comparing to the W23 fertile line. The total counts of RNA-seq reads are normalized to 10 million reads (TP10M) (Zhai et al., 2015).



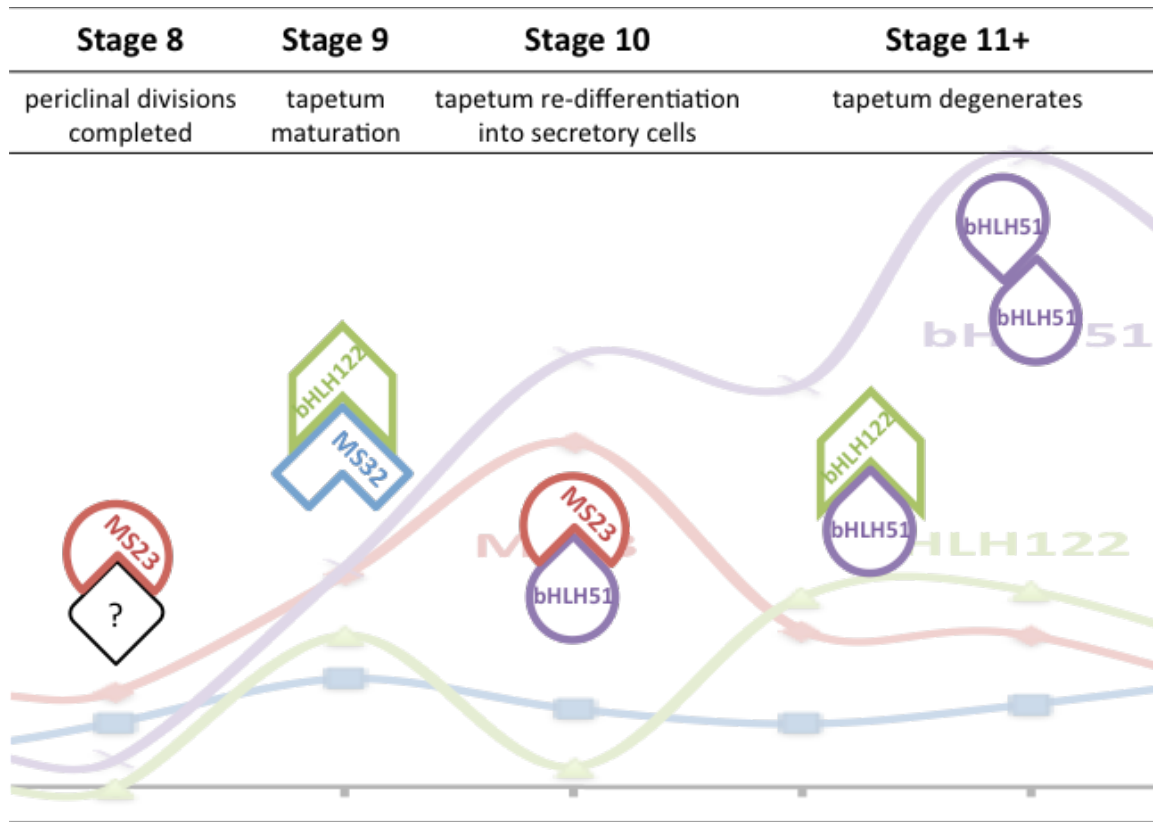

**Fig. S17. A proposed “partner exchange” model of sequential steps of tapetal differentiation in maize.** We propose that MS23 prevents periclinal division, likely as a heterodimer with an unknown factor to regulate the last periclinal division in the SPC and the pre-tapetal cells during their anticlinal proliferation in Stage 8. The MS23:unknown factor complex is required for tapetal cell fate. The MS32:bHLH122 complex acts to prevent excessive, aberrant divisions beyond Stage 9 after most tapetal cells are formed. The absence of bHLH122 at Stage 10 facilitates another partner exchange in which newly synthesized bHLH51 can interact with MS23, critical for the re-differentiation of the TP to serve its secretory roles at Stage 10. With bHLH122 reappears and MS23 levels off at Stage 11, bHLH51 is released to form new complexes (bHLH51:bHLH122 and bHLH51:bHLH51) for the post-meiotic, late development of the TP, e.g., tetrad callose dissolution, exine deposition onto pollen, maturation of somatic walls to permit pollen attachment, and ultimately programmed cell death of the TP.

**Table S1. Comparison of the amino acid identity to MS23 with twelve other bHLH proteins important for tapetal functions in maize, rice, and Arabidopsis anthers.**  
MS23 protein sequence was used as the basis for the comparison.

| <b>Protein Name (species)</b>          | <b>Total length<br/>(amino acids)</b> | <b>Amino acid identity<br/>(%)</b> | <b>bHLH domain identity<br/>(%)</b> |
|----------------------------------------|---------------------------------------|------------------------------------|-------------------------------------|
| MS23 ( <i>Zea mays</i> )               | 365                                   | 100.00                             | 100.00                              |
| TIP2 ( <i>Oryza sativa</i> )           | 379                                   | 72.68                              | 91.11                               |
| bHLH122 ( <i>Zea mays</i> )            | 491                                   | 27.38                              | 52.27                               |
| EAT1/DTD ( <i>Oryza sativa</i> )       | 464                                   | 26.36                              | 50.00                               |
| bHLH91 ( <i>Arabidopsis thaliana</i> ) | 428                                   | 25.43                              | 46.67                               |
| bHLH89 ( <i>Arabidopsis thaliana</i> ) | 420                                   | 26.43                              | 42.22                               |
| bHLH10 ( <i>Arabidopsis thaliana</i> ) | 458                                   | 26.21                              | 42.22                               |
| bHLH51 ( <i>Zea mays</i> )             | 625                                   | 13.93                              | 42.22                               |
| TDR ( <i>Oryza sativa</i> )            | 551                                   | 14.12                              | 42.22                               |
| AMS ( <i>Arabidopsis thaliana</i> )    | 571                                   | 12.75                              | 42.22                               |
| DYT1 ( <i>Arabidopsis thaliana</i> )   | 207                                   | 19.25                              | 37.78                               |
| MS32 ( <i>Zea mays</i> )               | 219                                   | 15.46                              | 35.56                               |
| UDT1 ( <i>Oryza sativa</i> )           | 177                                   | 20.12                              | 37.78                               |

**Table S2**

[Click here to Download Table S2](#)

**Table S3**

[Click here to Download Table S3](#)

**Table S4**

[Click here to Download Table S4](#)

**Table S5**

[Click here to Download Table S5](#)

**Table S6. Anther stages in maize, rice, and Arabidopsis.** Based on the developmental events previously defined (Kelliher et al., 2014; Sanders et al., 1999; Zhang and Wilson, 2009), anther stages in maize, rice, and Arabidopsis are compared and listed. AR – archesporial; EN – endothecium; SPC – secondary parietal cell; PMC – pollen mother cells.

| Events                                          | Anther stages |      |             |
|-------------------------------------------------|---------------|------|-------------|
|                                                 | Maize         | Rice | Arabidopsis |
| Pluripotent primordium                          | 1             | 1    | 1           |
| AR cells forming                                | 2             | 2    | 2           |
| EN and SPC forming                              | 3             | 3    | 3           |
| Three-wall-layer stage with EN and SPC complete | 4             | 4    | 3-4         |
| SPC periclinal divisions starts                 | 5             | 4    | 4           |
| Anticlinal divisions to add anther girth        | 6             | 4    | 4           |
| Final SPC periclinal divisions                  | 7             | 4    | 4-5         |
| AR cells mature to PMC                          | 8             | 5    | 5           |
| Meiosis starts                                  | 9             | 6    | 5-6         |
| Entering Meiosis II                             | 10            | 7    | 6-7         |
| Meiosis complete                                | 11            | 8    | 7           |

## Tables S7 – S9

[Click here to Download Tables S7 - S9](#)
